# Supplementary material for: A Novel Trichothecene Toxin Phenotype Associated with Horizontal Gene Transfer and a Change in Gene Function in Fusarium
Source: MDPI journal article supplement (doi:10.3390/toxins15010012), 2022-12-24
Supplement: s1 [file s1]

Article

# A Novel Trichothecene Toxin Phenotype Associated with Horizontal Gene Transfer and a Change in Gene Function in *Fusarium*

Robert H. Proctor, Guixia Hao, Hye-Seon Kim, Briana K. Whitaker, Imane Laraba, Martha M. Vaughan and Susan P. McCormick

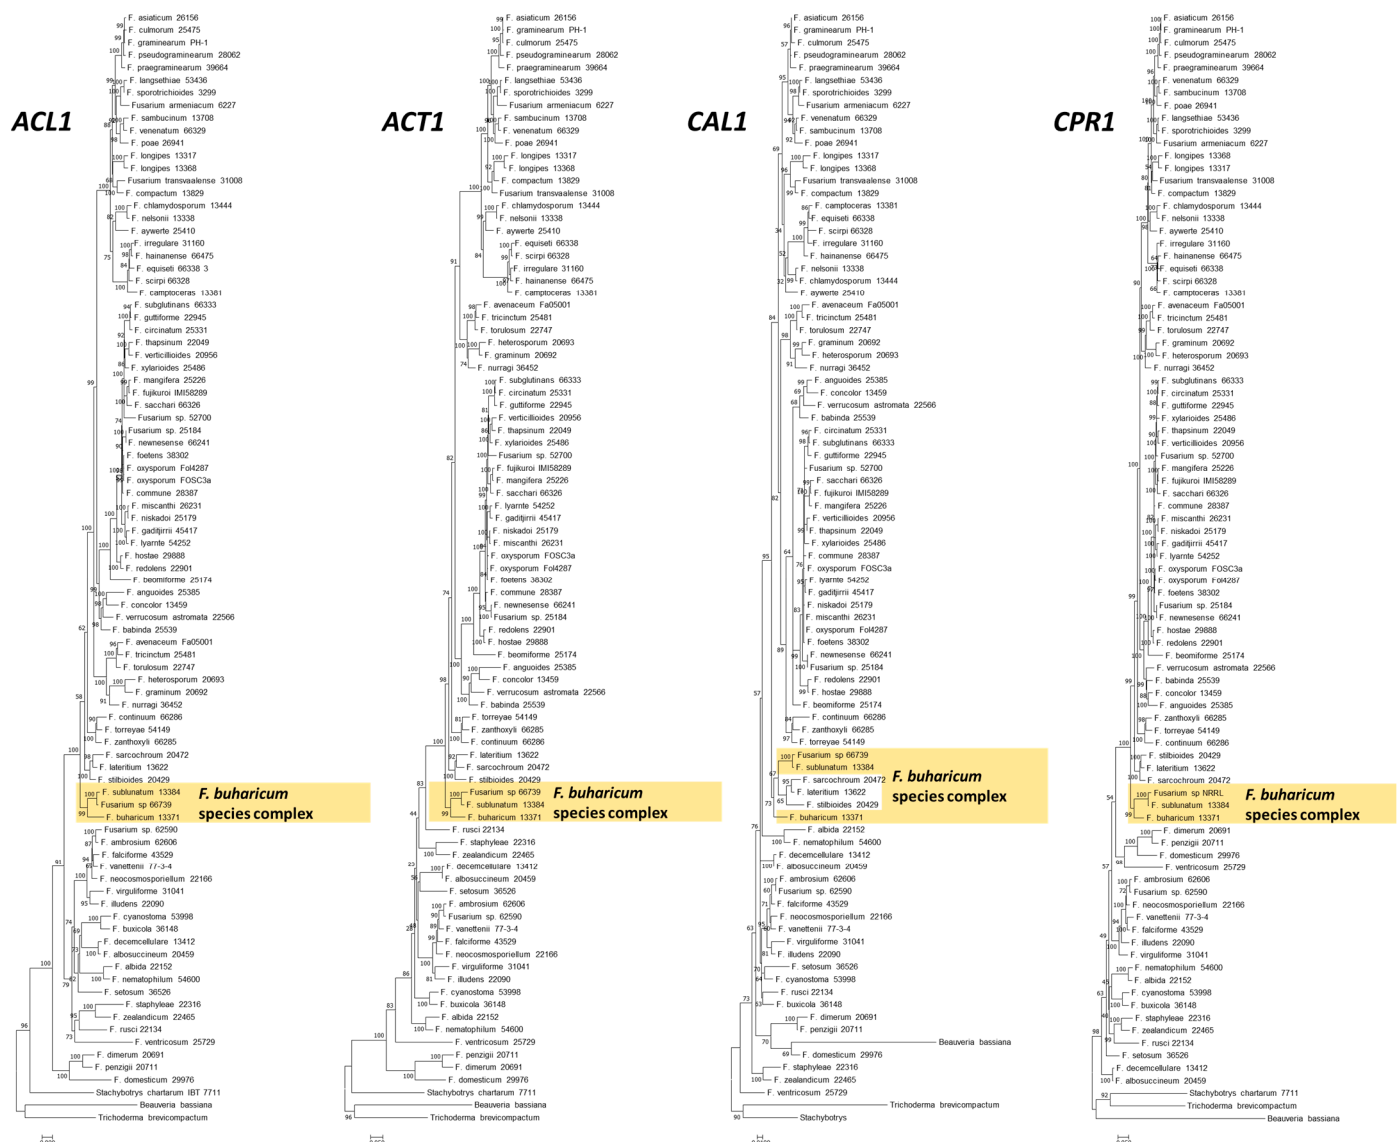

## Supplementary Figure S1 continued

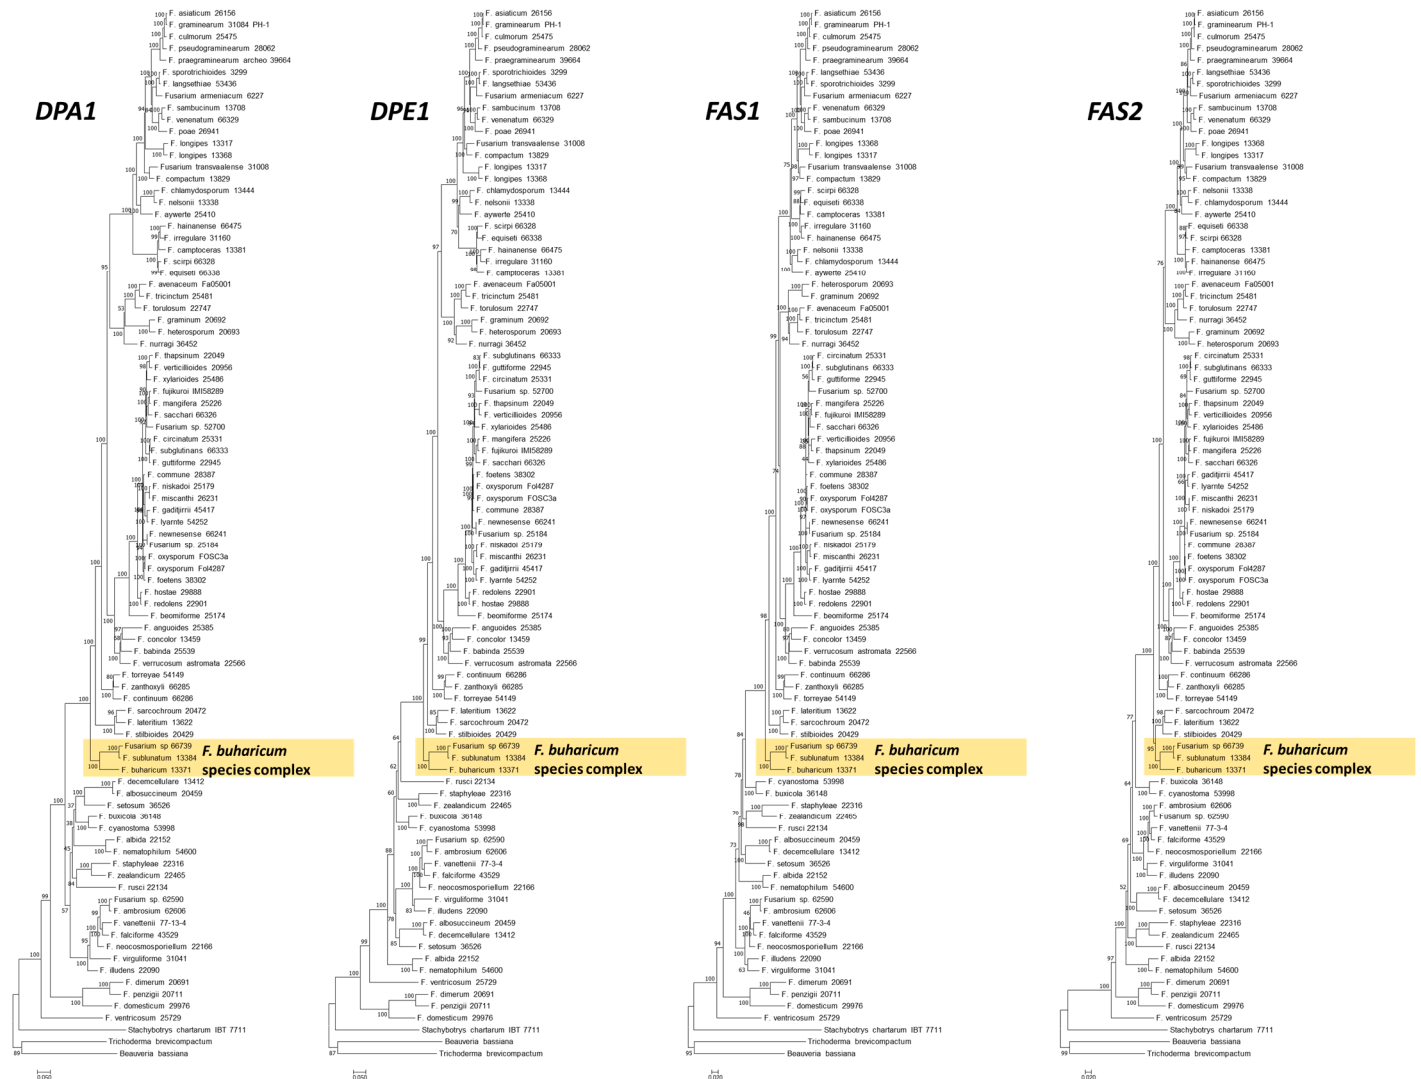

## Supplementary Figure S1 continued

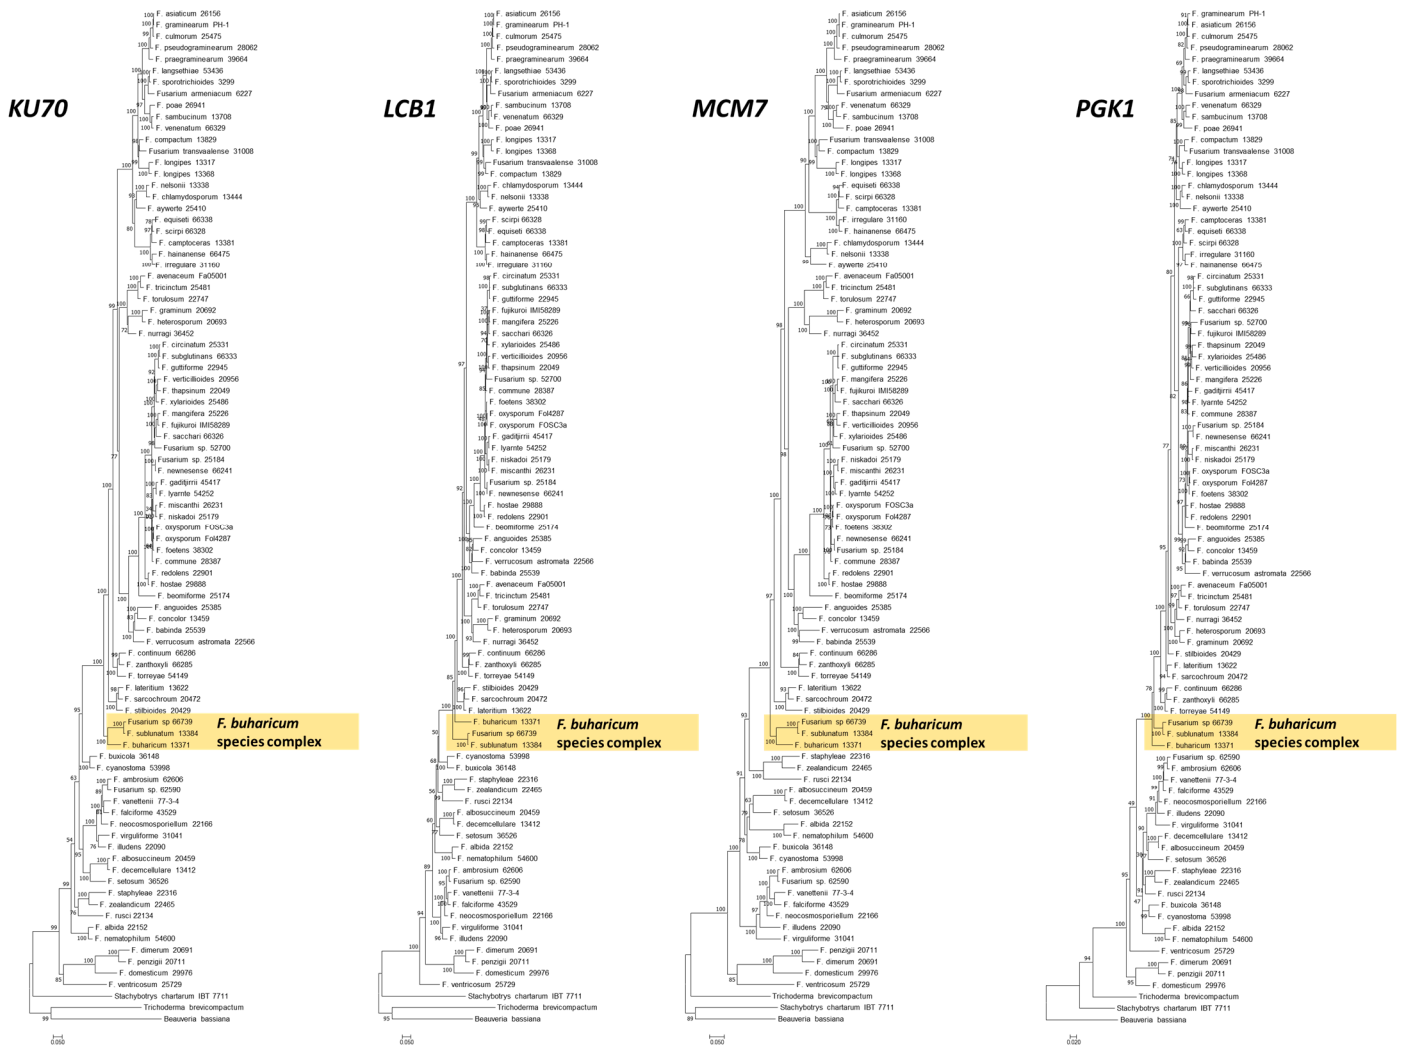

## Supplementary Figure S1 continued

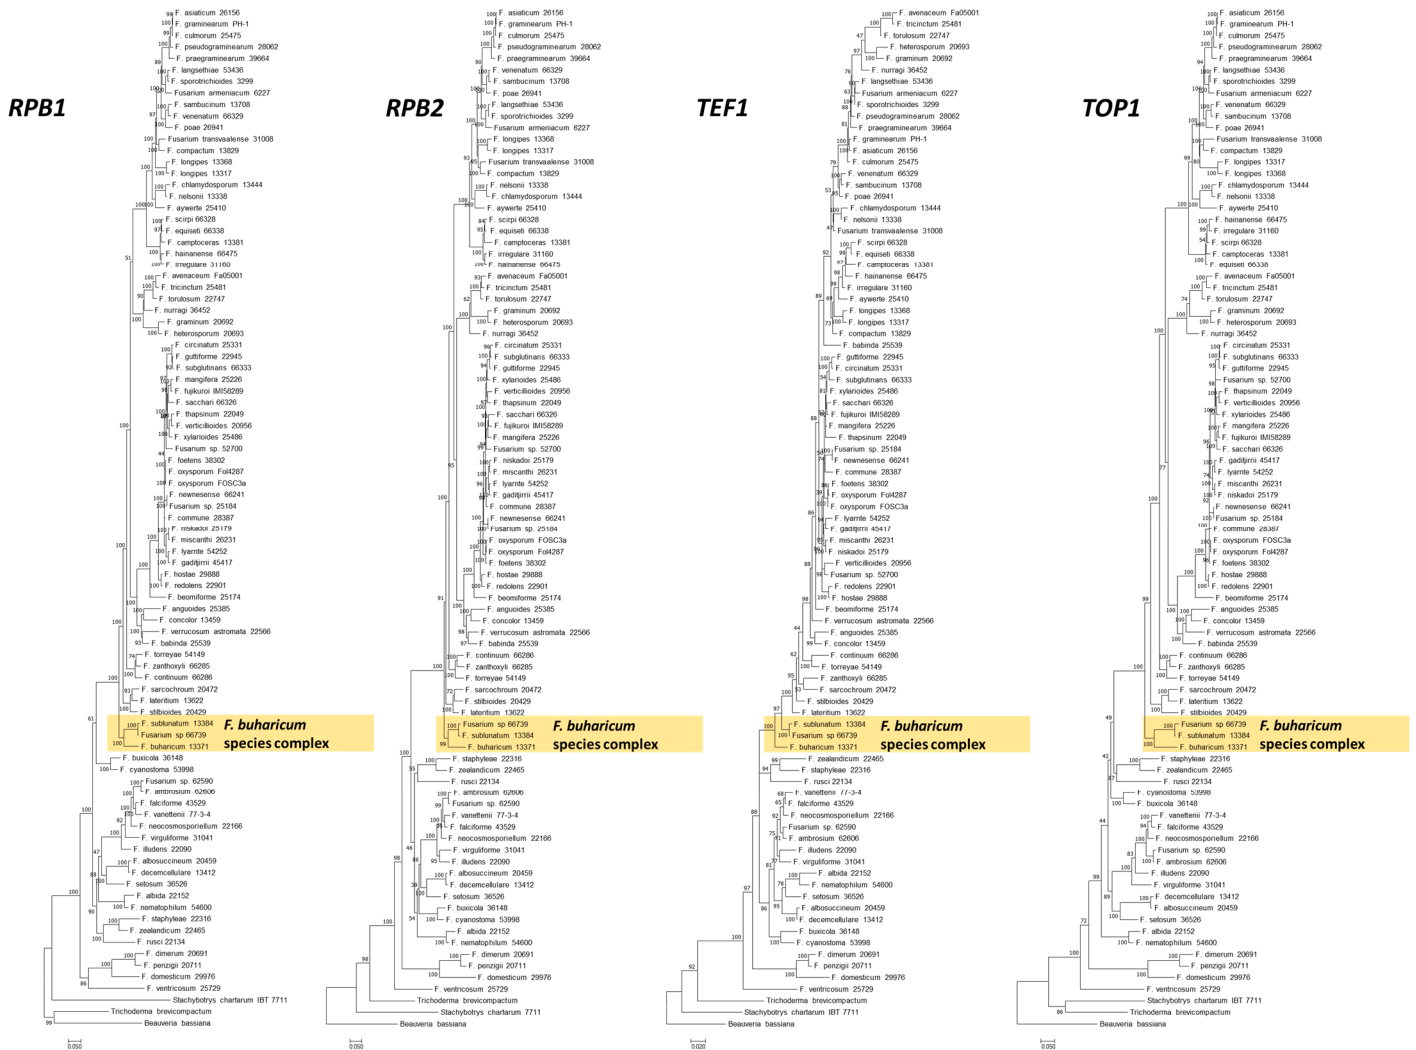

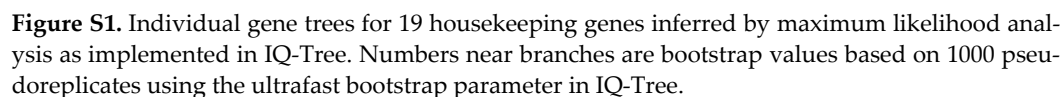

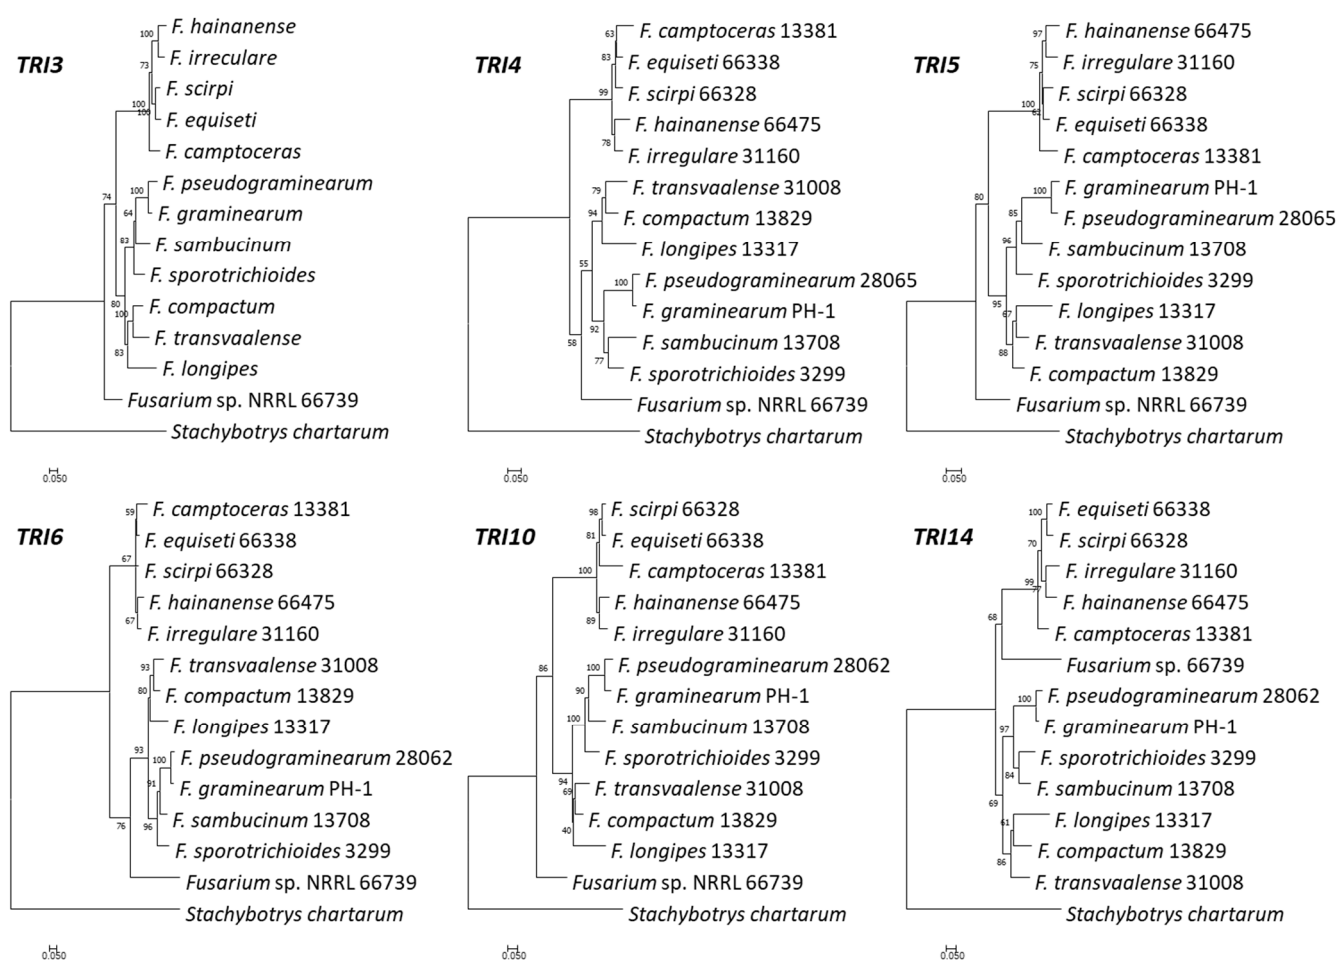

**Figure S2.** Individual gene trees for six trichothecene biosynthetic (*TRI*) genes inferred by maximum likelihood analysis as implemented in IQ-Tree. Numbers near branches are bootstrap values based on 1000 pseudoreplicates using the ultrafast bootstrap parameter in IQ-Tree.

**Table S1.** PCR primers used in this study.

| Primer name  | Sequence (5' → 3') <sup>a</sup>                      |
|--------------|------------------------------------------------------|
| TEF1-5-up    | <u>GGACTTAAU</u> CCGCGGATCCAGCAAACGGT                |
| TEF1-3       | GTTTGACGGTTGTGTATGGAAGATTGAGTG                       |
| TEF1-664F    | AAGCTTTGACCTCCTCGAGC                                 |
| TRI13-5      | <u>ACACAACCGTCAAAC</u> ATGATATTCATTTCAATTCGCGCTGGCAC |
| TRI13-3-down | <u>GGGTTTAAU</u> TTATTCGATATAAAGACTAGTCTCTC          |
| TRI13-399R   | GCGGTGGGCTCTAAAGGTAG                                 |
| CPM1-5       | <u>ACACAACCGTCAAAC</u> ATGATATTCATTTCAATTCGC         |
| CPM1-3-down  | <u>GGGTTTAAU</u> TCAGTTATGTAAGTGGTAAACTTGATCAG       |
| CPM1-437R    | AAATACCGCCAGACCTGTCTG                                |

<sup>a</sup> A single underline indicates sequence added to primers to facilitate USER cloning (New England Biolabs). A double underline indicates sequence complementary to the 3' end of *AbTEF1*pro that were added to primers to facilitate fusion of *AbTEF1*pro with the *TRI13* or F1155\_1930 coding regions.
